# Supplementary material for: Prevalence of childhood mental disorders in high-income countries: a systematic review and meta-analysis to inform policymaking
Source: HighWire-hosted journal article supplement (doi:10.1136/ebmental-2021-300277), 2021-07-19
Supplement: ebmental-2021-300277supp001_data_supplement.pdf [file ebmental-2021-300277supp001_data_supplement.pdf]

## Prevalence of Childhood Mental Disorders in High-Income Countries:

### A Systematic Review and Meta-Analysis to Inform Policymaking

Jenny Lou Barican<sup>1</sup>, Donna Yung<sup>1</sup>, Christine Schwartz<sup>1</sup>, Yufei Zheng<sup>1</sup>, Kathy Georgiades<sup>2</sup>, Charlotte Waddell<sup>1</sup>

- 1 Children's Health Policy Centre, Faculty of Health Sciences, Simon Fraser University, Vancouver, British Columbia
- 2 Offord Centre for Child Studies and Department of Psychiatry and Behavioural Neurosciences, Faculty of Health Sciences, McMaster University, Hamilton, Ontario

## Appendices

|                    |                                                                                                                          |           |
|--------------------|--------------------------------------------------------------------------------------------------------------------------|-----------|
| <b>Appendix A:</b> | <b>MOOSE and PRISMA Checklists</b>                                                                                       | <b>2</b>  |
| <b>Appendix B:</b> | <b>Search Strategy</b>                                                                                                   | <b>4</b>  |
| <b>Appendix C:</b> | <b>Study Inclusion Criteria</b>                                                                                          | <b>5</b>  |
| <b>Appendix D:</b> | <b>Included Studies</b>                                                                                                  | <b>6</b>  |
| <b>Appendix E:</b> | <b>Risk of Bias Quality Assessment Tool and Results</b>                                                                  | <b>7</b>  |
| <b>Appendix F:</b> | <b>Excluded Studies</b>                                                                                                  | <b>9</b>  |
| <b>Appendix G:</b> | <b>Meta-regression on the Effects of Potential Moderators on Overall Heterogeneity for Any Childhood Mental Disorder</b> | <b>17</b> |
| <b>Appendix H:</b> | <b>Forest Plots for Prevalence of Individual Disorders and Disorder Groups</b>                                           | <b>19</b> |

## Appendix A: MOOSE and PRISMA Checklists

| MOOSE CHECKLIST |                                                                                                                                            | PRISMA CHECKLIST |                                    |
|-----------------|--------------------------------------------------------------------------------------------------------------------------------------------|------------------|------------------------------------|
| ✓               | Criteria and description                                                                                                                   | ✓                | Criteria and description           |
|                 |                                                                                                                                            | ✓                | Title                              |
|                 |                                                                                                                                            | ✓                | Abstract                           |
|                 | <b>Reporting of background should include:</b>                                                                                             |                  | <b>Introduction</b>                |
| ✓               | Problem definition                                                                                                                         | ✓                | Rationale                          |
| N/A             | Hypothesis statement                                                                                                                       | ✓                | Objectives                         |
| ✓               | Description of study outcomes                                                                                                              |                  |                                    |
| ✓               | Type of exposure or intervention used                                                                                                      |                  |                                    |
| ✓               | Type of study designs used                                                                                                                 |                  |                                    |
| ✓               | Study population                                                                                                                           |                  |                                    |
|                 | <b>Reporting of search strategy should include:</b>                                                                                        |                  | <b>Methods</b>                     |
|                 |                                                                                                                                            | ✓                | Protocol and registration          |
|                 |                                                                                                                                            | ✓                | Eligibility criteria               |
| ✓               | Qualifications of searchers (e.g., librarians and investigators)                                                                           |                  |                                    |
| ✓               | Search strategy, including time period included in the synthesis and keywords                                                              | ✓                | Search                             |
| ✓               | Databases and registries searched                                                                                                          | ✓                | Information sources                |
| ✓               | Search software used, name and version, including special features (e.g., explosion)                                                       |                  |                                    |
| ✓               | Use of hand searching (e.g., reference lists of obtained articles)                                                                         |                  |                                    |
| ✓               | List of citations located and those excluded, including justifications                                                                     |                  |                                    |
| ✓               | Description of any contact with authors                                                                                                    |                  |                                    |
| ✓               | Method of addressing articles published in languages other than English                                                                    |                  |                                    |
| ✓               | Method of handling abstracts and unpublished studies                                                                                       |                  |                                    |
|                 | <b>Reporting of methods should include:</b>                                                                                                |                  |                                    |
| ✓               | Description of relevance or appropriateness of studies assembled for assessing the hypothesis to be tested                                 | ✓                | Study selection                    |
| ✓               | Rationale for the selection and coding of data (e.g., sound clinical principles or convenience)                                            |                  |                                    |
| ✓               | Documentation of how data were classified and coded (e.g., multiple raters, blinding and interrater reliability)                           | ✓                | Data collection process            |
|                 |                                                                                                                                            | ✓                | Data items                         |
|                 |                                                                                                                                            | ✓                | Summary measures                   |
|                 |                                                                                                                                            | ✓                | Risk of bias across studies        |
| N/A             | Assessment of confounding                                                                                                                  |                  |                                    |
| ✓               | Assessment of study quality, including blinding of quality assessors; stratification or regression on possible predictors of study results | ✓                | Risk of bias in individual studies |
| ✓               | Assessment of heterogeneity                                                                                                                | ✓                | Synthesis of results               |
| ✓               | Description of statistical methods in sufficient detail to be replicated                                                                   |                  |                                    |
|                 |                                                                                                                                            | ✓                | Additional analyses                |
| ✓               | Provision of appropriate tables and graphics                                                                                               |                  |                                    |

|     | Reporting of results should include:                                                                                    |   | Results                       |
|-----|-------------------------------------------------------------------------------------------------------------------------|---|-------------------------------|
|     |                                                                                                                         | ✓ | Study selection               |
| ✓   | Graph summarizing individual study estimates and overall estimate                                                       | ✓ | Results of individual studies |
| ✓   | Table giving descriptive information for each study included                                                            | ✓ | Study characteristics         |
|     |                                                                                                                         | ✓ | Synthesis of results          |
|     |                                                                                                                         | ✓ | Risk of bias within studies   |
| N/A | Results of sensitivity testing                                                                                          | ✓ | Additional analysis           |
| ✓   | Indication of statistical uncertainty of findings                                                                       |   |                               |
|     | Reporting of discussion should include:                                                                                 |   | Discussion                    |
| ✓   | Quantitative assessment of bias                                                                                         | ✓ | Risk of bias across studies   |
| ✓   | Justification for exclusion                                                                                             |   |                               |
| ✓   | Assessment of quality of included studies                                                                               |   |                               |
|     | Reporting of conclusions should include:                                                                                |   |                               |
| ✓   | Strengths and weaknesses                                                                                                | ✓ | Summary of evidence           |
| ✓   | Potential biases in the review process (e.g., publication bias)                                                         | ✓ | Limitations                   |
| ✓   | Consideration of alternative explanations for observed results                                                          | ✓ | Conclusions                   |
| ✓   | Generalization of the conclusions<br>Appropriate for the data presented and within the domain of the literature review. |   |                               |
| ✓   | Guidelines for future research                                                                                          |   |                               |
| ✓   | Disclosure of funding source                                                                                            | ✓ | Funding                       |

N/A Not applicable

## Appendix B: Search Strategy

### MEDLINE

| Step | Terms                                                                                                  | Hits      |
|------|--------------------------------------------------------------------------------------------------------|-----------|
| 1    | *Mental Disorders/ep                                                                                   | 14,099    |
| 2    | (exp Child/ or exp Adolescent/) not Adult/                                                             | 1,441,419 |
| 3    | exp Epidemiology/ or exp Prevalence/ or exp Incidence/ or exp Health Surveys/                          | 970,538   |
| 4    | (epidemiolog\$ or survey\$ or population or community or represent\$ or stratifi\$ or probability).mp. | 4,720,463 |
| 5    | 1 and 2 and 3 and 4                                                                                    | 1,001     |
| 6    | limit 5 to (yr="1990–current" and journal article and humans)                                          | 1,266     |

### PsycINFO

| Step | Terms                                                                                                                                   | Hits      |
|------|-----------------------------------------------------------------------------------------------------------------------------------------|-----------|
| 1    | SU *Mental Disorders                                                                                                                    | 146,392   |
| 2    | AG (Childhood OR Adolescence OR Young Adulthood)<br>NOT AG (Thirties or Middle Age or Aged)                                             | 754,918   |
| 3    | SU (Epidemiology) OR<br>KW (epidemiolog* OR prevalence OR incidence OR health survey)                                                   | 68,227    |
| 4    | AB (epidemiolog* or survey* or population or community or represent* or stratifi* or probability)                                       | 1,039,360 |
| 5    | 1 and 2 and 3 and 4                                                                                                                     | 1,136     |
| 6    | limit 5 to (Publication Year: 1990–2021; Peer Reviewed; Population Group: Human; Document Type: Journal Article; Exclude Dissertations) | 891       |

### EMBASE

| Step | Terms                                                                                                                                | Hits      |
|------|--------------------------------------------------------------------------------------------------------------------------------------|-----------|
| 1    | 'Mental Disorders'/exp/mj (subheading: epidemiology)                                                                                 | 81,540    |
| 2    | AG (Childhood OR Adolescen*)<br>NOT AG (Thirties or 'Middle Aged' or Aged)<br>(limit to preschool child, school child or adolescent) | 1,513,745 |
| 3    | exp Epidemiology OR<br>KW (epidemiolog* OR prevalence OR incidence OR health survey)                                                 | 3,237,705 |
| 4    | AB (epidemiolog* or survey* or population or community or represent* or stratifi* or probability)                                    | 4,216,831 |
| 5    | 1 and 2 and 3 and 4                                                                                                                  | 1,846     |
| 6    | limit 5 to (Publication Year: 1990–2021; Publication Type: Article; Index Term: Human)                                               | 1,602     |

Note: First and second authors (J.L.B. and D.Y.) conducted all searches.

### Appendix C: Study Inclusion Criteria

- 1 Focused on children  $\leq 18$  years or reported separately on children if adults were included.
- 2 Published in a peer-reviewed journal between January 1990 and February 2021.
- 3 Population was drawn from a high-income country (by World Bank standards).
- 4 Sample was representative of a national or regional population.\*
- 5 Used probabilistic sampling to select respondents from a reliable frame.†
- 6 Clear descriptions of participant characteristics, study settings and methods provided.
- 7 Mental disorder diagnoses including impairment were based on DSM-IV and later editions or ICD-10 and later editions.
- 8 Diagnostic measures were reliable and valid.
- 9 Prevalence reported, or sufficient information was provided to estimate prevalence.
- 10 Prevalence for three or more individual disorders, and overall prevalence of any disorder reported.

\* Regional populations were those covering/representing a province, state or other large geographic area.

† Sampling frame comprised all possible units (e.g., individuals, schools or households) within a target population.

## Appendix D: Included Studies

- s1. Kessler RC, Avenevoli S, Costello J, *et al.* Severity of 12-month DSM-IV disorders in the National Comorbidity Survey Replication Adolescent Supplement. *Arch Gen Psychiatry* 2012;69:381–389. doi:10.1001/archgenpsychiatry.2011.1603
- s2. Canino G, Shrout PE, Rubio-Stipec M, *et al.* The DSM-IV rates of child and adolescent disorders in Puerto Rico: Prevalence, correlates, service use, and the effects of impairment. *Arch Gen Psychiatry* 2004;61:85–93. doi:10.1001/archpsyc.61.1.85
- s3. Chen YL, Chen WJ, Lin KC, *et al.* Prevalence of DSM-5 mental disorders in a nationally representative sample of children in Taiwan: Methodology and main findings. *Epidemiol Psychiatr Sci* 2020;29:1–9. doi:10.1017/S2045796018000793
- s4. Costello EJ, Mustillo S, Erkanli A, *et al.* Prevalence and development of psychiatric disorders in childhood and adolescence. *Arch Gen Psychiatry* 2003;60:837–44. doi:10.1001/archpsyc.60.8.837
- s5. Elberling H, Linneberg A, Rask CU, *et al.* Psychiatric disorders in Danish children aged 5–7 years: A general population study of prevalence and risk factors from the Copenhagen Child Cohort (CCC 2000). *Nord J Psychiatry* 2016;70:146–55. doi:10.3109/08039488.2015.1070199
- s6. Farbstein I, Mansbach-Kleinfeld I, Levinson D, *et al.* Prevalence and correlates of mental disorders in Israeli adolescents: Results from a national mental health survey. *J Child Psychol Psychiatry* 2010;51:630–9. doi:10.1111/j.1469-7610.2009.02188.x
- s7. Ford T, Goodman R, Meltzer H. The British Child and Adolescent Mental Health Survey 1999: The prevalence of DSM-IV disorders. *J Am Acad Child Adolesc Psychiatry* 2003;42:1203–11. doi:10.1097/00004583-200310000-00011
- s8. Georgiades K, Duncan L, Wang L, *et al.* Six-month prevalence of mental disorders and service contacts among children and youth in Ontario: Evidence from the 2014 Ontario Child Health Study. *Can J Psychiatry* 2019;64:246–55. doi:10.1177/0706743719830024
- s9. Heiervang E, Stormark KM, Lundervold AJ, *et al.* Psychiatric disorders in Norwegian 8- to 10-year-olds: An epidemiological survey of prevalence, risk factors, and service use. *J Am Acad Child Adolesc Psychiatry* 2007;46:438–47. doi:10.1097/chi.0b013e31803062bf
- s10. Kessler RC, Avenevoli S, Costello EJ, *et al.* Prevalence, persistence, and sociodemographic correlates of DSM-IV disorders in the National Comorbidity Survey Replication Adolescent Supplement. *Arch Gen Psychiatry* 2012;69:372–80. doi:10.1001/archgenpsychiatry.2011.160
- s11. Lawrence D, Hafekost J, Johnson SE, *et al.* Key findings from the second Australian Child and Adolescent Survey of Mental Health and Wellbeing. *Aust N Z J Psychiatry* 2016;50:876–86. doi:10.1177/0004867415617836
- s12. Lesinskiene S, Girdzijauskiene S, Gintiliene G, *et al.* Epidemiological study of child and adolescent psychiatric disorders in Lithuania. *BMC Public Health* 2018;18:1–8. doi:10.1186/s12889-018-5436-3
- s13. Merikangas KR, He JP, Brody D, *et al.* Prevalence and treatment of mental disorders among US children in the 2001–2004 NHANES. *Pediatrics* 2010;125:75–81. doi:10.1542/peds.2008-2598
- s14. Park S, Kim BN, Cho SC, *et al.* Prevalence, correlates, and comorbidities of DSM-IV psychiatric disorders in children in Seoul, Korea. *Asia Pac J Public Health* 2015;27:1942–51. doi:10.1177/1010539513475656
- s15. Vicente B, Saldivia S, de la Barra F, *et al.* Prevalence of child and adolescent mental disorders in Chile: A community epidemiological study. *J Child Psychol Psychiatry* 2012;53:1026–35. doi:10.1111/j.1469-7610.2012.02566.x

## Appendix E: Risk of Bias Quality Assessment Tool

### Quality Assessment Checklist for Prevalence Studies (adapted from Hoy *et al.*, 2012)<sup>1</sup>

Name of author(s) and date:

Study/Survey Name:

| Risk of bias item                                                                                                                     | Risk of bias levels                                                                                                                                                                                                                             | Score |
|---------------------------------------------------------------------------------------------------------------------------------------|-------------------------------------------------------------------------------------------------------------------------------------------------------------------------------------------------------------------------------------------------|-------|
| External validity (Selection bias)                                                                                                    |                                                                                                                                                                                                                                                 |       |
| 1. Was the study's target population a close representation of the regional or national population in relation to relevant variables? | <b>Yes (LOW RISK):</b> The study's target population was a close representation of the regional or national population.                                                                                                                         | 0     |
|                                                                                                                                       | <b>No (HIGH RISK):</b> The study's target population was clearly NOT a close representation of the regional or national population.                                                                                                             | 1     |
| 2. Was the sampling frame a true or close representation of the target population?                                                    | <b>Yes (LOW RISK):</b> The sampling frame was a true or close representation of the target population.                                                                                                                                          | 0     |
|                                                                                                                                       | <b>No (HIGH RISK):</b> The sampling frame was NOT a true or close representation of the target population.                                                                                                                                      | 1     |
| 3. Was some form of random selection used to select the sample, OR was a census undertaken?                                           | <b>Yes (LOW RISK):</b> A census was undertaken, OR, some form of random selection was used to select the sample (e.g. simple random sampling, stratified random sampling, cluster sampling, systematic sampling).                               | 0     |
|                                                                                                                                       | <b>No (HIGH RISK):</b> A census was NOT undertaken, AND some form of random selection was NOT used to select the sample.                                                                                                                        | 1     |
| External validity (Nonresponse bias)                                                                                                  |                                                                                                                                                                                                                                                 |       |
| 4. Was the likelihood of nonresponse bias minimal?                                                                                    | <b>Yes (LOW RISK):</b> The response rate for the study was $\geq 75\%$ , OR, an analysis was performed that showed no significant difference in relevant demographic characteristics between responders and non-responders                      | 0     |
|                                                                                                                                       | <b>No (HIGH RISK):</b> The response rate was $< 75\%$ , and if any analysis comparing responders and non-responders was done, it showed a significant difference in relevant demographic characteristics between responders and non-responders. | 1     |
| Internal validity (Measurement bias)                                                                                                  |                                                                                                                                                                                                                                                 |       |
| 5. Was the informant(s) appropriate for the data collected?                                                                           | <b>Yes (LOW RISK):</b> All data were collected from appropriate informant(s).                                                                                                                                                                   | 0     |
|                                                                                                                                       | <b>No (HIGH RISK):</b> In majority of instances, data were collected from a proxy.                                                                                                                                                              | 1     |
| 6. Was an acceptable case definition used in the study?                                                                               | <b>Yes (LOW RISK):</b> An acceptable case definition was used.                                                                                                                                                                                  | 0     |
|                                                                                                                                       | <b>No (HIGH RISK):</b> An acceptable case definition was NOT used.                                                                                                                                                                              | 1     |
| 7. Was the study instrument that measured the parameter of interest shown to have validity and reliability?                           | <b>Yes (LOW RISK):</b> The study instrument had been shown to have reliability and validity (if this was necessary), e.g. test-re-test, piloting, validation in a previous study, etc.                                                          | 0     |
|                                                                                                                                       | <b>No (HIGH RISK):</b> The study instrument had NOT been shown to have reliability or validity (if this was necessary).                                                                                                                         | 1     |
| 8. Was the same mode of data collection used for all subjects?                                                                        | <b>Yes (LOW RISK):</b> The same mode of data collection was used for all subjects.                                                                                                                                                              | 0     |
|                                                                                                                                       | <b>No (HIGH RISK):</b> The same mode of data collection was NOT used for all subjects.                                                                                                                                                          | 1     |
| 9. Was the length of the shortest prevalence period for the parameter of interest appropriate?                                        | <b>Yes (LOW RISK):</b> The shortest prevalence period for the parameter of interest was appropriate (e.g. point prevalence, one-week prevalence, one-year prevalence).                                                                          | 0     |
|                                                                                                                                       | <b>No (HIGH RISK):</b> The shortest prevalence period for the parameter of interest was not appropriate (e.g. lifetime prevalence).                                                                                                             | 1     |
| Internal validity (Bias related to analysis)                                                                                          |                                                                                                                                                                                                                                                 |       |
| 10. Were the numerator(s) and denominator(s) for the parameter of interest appropriate?                                               | <b>Yes (LOW RISK):</b> The paper presented appropriate numerator(s) AND denominator(s) for the parameter of interest (e.g. the prevalence of low back pain).                                                                                    | 0     |
|                                                                                                                                       | <b>No (HIGH RISK):</b> The paper did present numerator(s) AND denominator(s) for the parameter of interest but one or more of these were inappropriate.                                                                                         | 1     |
| Summary on the overall risk of study                                                                                                  | <b>Low risk:</b> Further research is very unlikely to change our confidence in the estimate                                                                                                                                                     | 0–3   |
|                                                                                                                                       | <b>Moderate risk:</b> Further research is likely to have an important impact on our confidence in the estimate and may change the estimate.                                                                                                     | 4–6   |
|                                                                                                                                       | <b>High risk:</b> Further research is very likely to have an important impact on our confidence in the estimate and is likely to change the estimate.                                                                                           | 7–10  |

1. Hoy D, Brooks P, Woolf A, Blyth F, March L, Bain C, *et al.* Assessing risk of bias in prevalence studies: modification of an existing tool and evidence of interrater agreement. *J Clin Epidemiol.* 2012;65:934-939.

Risk of Bias: Summary of Results

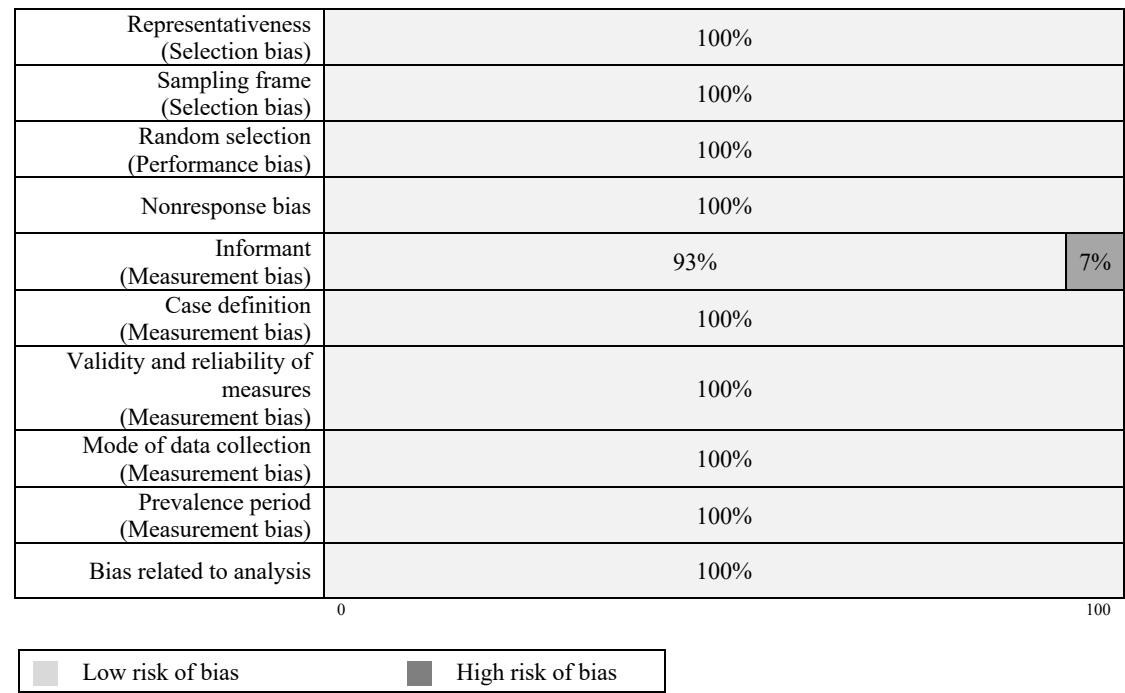

## Appendix F: Excluded Studies

### Non-representative sample (n=39)

1. Al-Modayfer, O., & Alatiq, Y. (2015). A pilot study on the prevalence of psychiatric disorders among Saudi children and adolescents: A sample from a selected community in Riyadh City. *Arab Journal of Psychiatry*, 26(2), 184-192.
2. Angold, A., Erkanli, A., Farmer, E. M., Fairbank, J. A., Burns, B. J., Keeler, G., & Costello, E. J. (2002). Psychiatric disorder, impairment, and service use in rural African American and white youth. *Archives of General Psychiatry*, 59(10), 893-901.
3. Bufferd, S. J., Dougherty, L. R., Carlson, G. A., Rose, S., & Klein, D. N. (2012). Psychiatric disorders in preschoolers: Continuity from ages 3 to 6. *The American Journal of Psychiatry*, 169(11), 1157-1164.
4. Canals, J., Domenech, E., Carbajo, G., & Blade, J. (1997). Prevalence of DSM-III-R and ICD-10 psychiatric disorders in a Spanish population of 18-year-olds. *Acta Psychiatrica Scandinavica*, 96(4), 287-294.
5. Canals, J., Voltas, N., Hernández-Martínez, C., Cosi, S., & Arijia, V. (2019). Prevalence of DSM-5 anxiety disorders, comorbidity, and persistence of symptoms in Spanish early adolescents. *European Child & Adolescent Psychiatry*, 28, 131-143.
6. Carter, A. S., Wagmiller, R. J., Gray, S. A., McCarthy, K. J., Horwitz, S. M., & Briggs-Gowan, M. J. (2010). Prevalence of DSM-IV disorder in a representative, healthy birth cohort at school entry: sociodemographic risks and social adaptation. *Journal of the American Academy of Child & Adolescent Psychiatry*, 49(7), 686-698.
7. Coughlan, H., Tiedt, L., Clarke, M., Kelleher, I., Tabish, J., Molloy, C., . . . Cannon, M. (2014). Prevalence of DSM-IV mental disorders, deliberate self-harm and suicidal ideation in early adolescence: an Irish population-based study. *Journal of Adolescence*, 37(1), 1-9.
8. Cuffe, S. P., McKeown, R. E., Addy, C. L., & Garrison, C. Z. (2005). Family and psychosocial risk factors in a longitudinal epidemiological study of adolescents. *Journal of the American Academy of Child & Adolescent Psychiatry*, 44(2), 121-129.
9. Daem, R., Mansbach-Kleinfeld, I., Farbstein, I., Goodman, R., Elias, R., Ifrah, A., . . . Apter, A. (2019). Correlates of mental disorders among minority Arab adolescents in Israel: Results from the Galilee Study. *Israel Journal of Health Policy Research*, 8(1).
10. Danielson, M. L., Bitso, R. H., Holbrook, J. R., Charania, S. N., Claussen, A. H., McKeown, R. E., . . . Flory, K. (2020). Community-based prevalence of externalizing and internalizing disorders among school-aged children and adolescents in four geographically dispersed school districts in the United States. *Child Psychiatry & Human Development*. doi:10.1007/s10578-020-01027-z
11. Dimigen, G., Del Priore, C., Butler, S., Evans, S., Ferguson, L., & Swan, M. (1999). Psychiatric disorder among children at time of entering local authority care: Questionnaire survey. *BMJ*, 319(7211), 675.
12. Eapen, V., al-Gazali, L., Bin-Othman, S., & Abou-Saleh, M. (1998). Mental health problems among schoolchildren in United Arab Emirates: Prevalence and risk factors. *Journal of the American Academy of Child & Adolescent Psychiatry*, 37(8), 880-886.
13. Eapen, V., Jakka, M. E., & Abou-Saleh, M. T. (2003). Children with psychiatric disorders: The A1 Ain Community Psychiatric Survey. *Canadian Journal of Psychiatry*, 48(6), 402-407.
14. Essau, C. A., Conradt, J., & Petermann, F. (2000). Frequency, comorbidity, and psychosocial impairment of depressive disorders in adolescents. *Journal of Adolescent Research*, 15(4), 470-481.
15. Esser, G., Schmidt, M. H., & Woerner, W. (1990). Epidemiology and course of psychiatric disorders in school-age children: Results of a longitudinal study. *Journal of Child Psychology & Psychiatry & Allied Disciplines*, 31(2), 243-263.
16. Faravelli, C., Lo Sauro, C., Castellini, G., Ricca, V., & Pallanti, S. (2009). Prevalence and correlates of mental disorders in a school-survey sample. *Clinical Practice and Epidemiology in Mental Health*, 5.
17. Frigerio, A., Rucci, P., Goodman, R., Ammaniti, M., Carlet, O., Cavolina, P., . . . Molteni, M. (2009). Prevalence and correlates of mental disorders among adolescents in Italy: The PrISMA study. *European Child and Adolescent Psychiatry*, 18(4), 217-226.
18. Gårdvik, K. S., Rygg, M., Torgersen, T., Lydersen, S., & Indredavik, M. S. (2020). Psychiatric morbidity, somatic comorbidity and substance use in an adolescent psychiatric population at 3-year follow-up. *European Child & Adolescent Psychiatry*. doi.org/10.1007/s00787-020-01602-8
19. Gau, S. S. F., Chong, M. Y., Chen, T. H. H., & Cheng, A. T. A. (2005). A 3-year panel study of mental disorders among adolescents in Taiwan. *American Journal of Psychiatry*, 162(7), 1344-1350.

20. Goodman, R., Ford, T., Richards, H., Gatward, R., & Meltzer, H. (2000). The development and well-being assessment: Description and initial validation of an integrated assessment of child and adolescent psychopathology. *Journal of Child Psychology and Psychiatry*, 41(5), 645–655.
21. Griesler, P. C., Hu, M. C., Schaffran, C., & Kandel, D. B. (2008). Comorbidity of psychiatric disorders and nicotine dependence among adolescents: findings from a prospective, longitudinal study. *Journal of the American Academy of Child & Adolescent Psychiatry*, 47(11), 1340–1350.
22. Gudmundsson, O. O., Magnusson, P., Saemundsen, E., Lauth, B., Baldursson, G., Skarphedinsson, G., & Fombonne, E. (2013). Psychiatric disorders in an urban sample of preschool children. *Child and Adolescent Mental Health*, 18(4), 210–217.
23. Harley, M. E., Connor, D., Clarke, M. C., Kelleher, I., Coughlan, H., Lynch, F., . . . Cannon, M. (2015). Prevalence of mental disorder among young adults in Ireland: A population based study. *Irish Journal of Psychological Medicine*, 32(Spec Iss1), 79–91.
24. Lavigne, J. V., Lebaillly, S. A., Hopkins, J., Gouze, K. R., & Binns, H. J. (2009). The prevalence of ADHD, ODD, depression, and anxiety in a community sample of 4-year-olds. *Journal of Clinical Child and Adolescent Psychology*, 38(3), 315–328.
25. Leung, P. W., Hung, S. F., Ho, T. P., Lee, C. C., Liu, W. S., Tang, C. P., & Kwong, S. L. (2008). Prevalence of DSM-IV disorders in Chinese adolescents and the effects of an impairment criterion: a pilot community study in Hong Kong. *European Child & Adolescent Psychiatry*, 17(7), 452–461.
26. Loperfido, E., & Rigon, G. (1994). Valutazione epicritica di una ricerca di prevalenza dei disturbi psichiatrici nella popolazione dell'obbligo scolastico = Final appraisal about a prevalence research regarding the psychiatric disorders in a compulsory school population (aged 6 to 12). *Giornale di Neuropsichiatria dell'Età Evolutiva*, 14(1), 17–25.
27. Melfsen, S., Walitza, S., & Warnke, A. (2006). The extent of social anxiety in combination with mental disorders. *European Child & Adolescent Psychiatry*, 15(2), 111–117.
28. Meyer, J. M., Silberg, J. L., Simonoff, E., Kendler, K. S., & Hewitt, J. K. (1996). The Virginia Twin-Family Study of Adolescent Behavioral Development: Assessing sample biases in demographic correlates of psychopathology. *Psychological Medicine*, 26(6), 1119–1133.
29. Morita, H., Suzuki, M., Suzuki, S., & Kamoshita, S. (1993). Psychiatric disorders in Japanese secondary school children. *Journal of Child Psychology & Psychiatry & Allied Disciplines*, 34(3), 317–332.
30. Nesvag, R., Bramness, J. G., Handal, M., Hartz, I., Hjellvik, V., & Skurtveit, S. (2018). The incidence, psychiatric co-morbidity and pharmacological treatment of severe mental disorders in children and adolescents. *European Psychiatry*, 49, 16–22.
31. Petersen, D. J., Bilenberg, N., Hoerder, K., & Gillberg, C. (2006). The population prevalence of child psychiatric disorders in Danish 8- to 9-year-old children. *European Child & Adolescent Psychiatry*, 15(2), 71–78.
32. Rijlaarsdam, J., Stevens, G. W., van der Ende, J., Hofman, A., Jaddoe, V. W., Verhulst, F. C., & Tiemeier, H. (2015). Prevalence of DSM-IV disorders in a population-based sample of 5- to 8-year-old children: the impact of impairment criteria. *European Child & Adolescent Psychiatry*, 24(11), 1339–1348.
33. Roberts, R. E., Roberts, C. R., & Xing, Y. (2007b). Rates of DSM-IV psychiatric disorders among adolescents in a large metropolitan area. *Journal of Psychiatric Research*, 41(11), 959–967.
34. Roberts, N., Stuart, H., & Lam, M. (2008). High school mental health survey: Assessment of a mental health screen. *Canadian Journal of Psychiatry*, 53(5), 314–322.
35. Seidler, Z. E., Rice, S. M., Dhillon, H. M., Cotton, S. M., Telford, N. R., McEachran, J., . . . Rickwood, D. J. (2020). Patterns of youth mental health service use and discontinuation: Population data from Australia's headspace model of care. *Psychiatric Services*, 77(11), 1104–1113.
36. Suzuki, M., Suzuki, S., & Morita, H. (1990). Epidemiological survey of psychiatric disorders of Japanese school children. Part 2. Prevalence of psychiatric disorders in school children. *[Nippon kōshū eisei zasshi] Japanese Journal of Public Health*, 37(3), 146–152.
37. Toledo, V., De La Barra, F., Lopez, C., George, M., & Rodriguez, J. (1997). Psychiatric diagnosis in a cohort of first grade basic course children from the Western area of Santiago de Chile. *Revista Chilena de Neuro-Psiquiatria*, 35(1), 17–24.
38. Wichstrøm, L., Berg-Nielsen, T. S., Angold, A., Egger, H. L., Solheim, E., & Sveen, T. H. (2012). Prevalence of psychiatric disorders in preschoolers. *Journal of Child Psychology and Psychiatry and Allied Disciplines*, 53(6), 695–705.

39. Yoo, H. I., Cho, S. C., Kim, B. N., Kim, S. Y., Shin, M. S., & Hong, K. E. (2005). Psychiatric morbidity of second and third grade primary school children in Korea. *Child Psychiatry & Human Development*, 36(2), 215-225.

**No relevant diagnoses reported (n=37)**

1. Al Gelban, K. S. (2009). Prevalence of psychological symptoms in Saudi secondary school girls in Abha, Saudi Arabia. *Annals of Saudi Medicine*, 29(4), 275-279.
2. Baranne, M. L., & Falissard, B. (2018). Global burden of mental disorders among children aged 5–14 years. *Child and Adolescent Psychiatry and Mental Health*, 12.
3. Basterra, V. (2016). [Percentage of psychoemotional problems in Spanish children and adolescents. Differences between 2006 and 2012]. *Medicina Clinica*, 147(9), 393-396.
4. Bjereld, Y., Daneback, K., Gunnarsdottir, H., & Petzold, M. (2015). Mental health problems and social resource factors among bullied children in the Nordic countries: A population based cross-sectional study. *Child Psychiatry & Human Development*, 46(2), 281-288.
5. Blanchard, L. T., Gurka, M. J., & Blackman, J. A. (2006). Emotional, developmental, and behavioral health of American children and their families: A report from the 2003 National Survey of Children's Health. *Pediatrics*, 117(6), e1202-1212.
6. Carvalho, M., De Matos, M. G., & Social Adventure Project, T. (2014). Psychosocial determinants of mental health and risk behaviours in adolescents. *Global Journal of Health Science*, 6(4), 22-35.
7. Chen, K. W., Killea-Jones, L. A., & Vega, W. A. (2005). Prevalence and co-occurrence of psychiatric symptom clusters in the U.S. adolescent population using DISC predictive scales. *Clinical Practice and Epidemiology in Mental Health*, 1.
8. Collishaw, S., Maughan, B., Natarajan, L., & Pickles, A. (2010). Trends in adolescent emotional problems in England: a comparison of two national cohorts twenty years apart. *Journal of Child Psychology and Psychiatry and Allied Disciplines*, 51(8), 885-894.
9. Garton, A. F., Zubrick, S. R., & Silburn, S. R. (1995). The Western Australian child health survey: A pilot study. *Australian and New Zealand Journal of Psychiatry*, 29(1), 48-57.
10. Hölling, H., Kurth, B.-M., Rothenberger, A., Becker, A., & Schlack, R. (2008). Assessing psychopathological problems of children and adolescents from 3 to 17 years in a nationwide representative sample: Results of the German health interview and examination survey for children and adolescents (KiGGS). *European Child & Adolescent Psychiatry*, 17(Suppl 1), 34-41.
11. Husky, M. M., Boyd, A., Bitfoi, A., Carta, M. G., Chan-Chee, C., Goelitz, D., . . . Kovess-Masfety, V. (2018). Self-reported mental health in children ages 6-12 years across eight European countries. *European Child & Adolescent Psychiatry*, 27(6), 785-795.
12. Jane, M. C., Canals, J., Ballester, S., Vinas, F., Esparo, G., & Domenech, E. (2006). Parents and teachers reports of DSM-IV psychopathological symptoms in preschool children: Differences between urban-rural Spanish areas. *Social Psychiatry & Psychiatric Epidemiology*, 41(5), 386-393.
13. Joe, S., Baser, R. S., Neighbors, H. W., Caldwell, C. H., & Jackson, J. S. (2009). 12-month and lifetime prevalence of suicide attempts among Black adolescents in the National Survey of American Life. *Journal of the American Academy of Child & Adolescent Psychiatry*, 48(3), 271-282.
14. Keenan, K., Hipwell, A., Chung, T., Stepp, S., Stouthamer-Loeber, M., Loeber, R., & McTigue, K. (2010). The pittsburgh girls study: Overview and initial findings. *Journal of Clinical Child and Adolescent Psychology*, 39(4), 506-521.
15. Levy, F., Young, D. J., Bennett, K. S., Martin, N. C., & Hay, D. A. (2013). Comorbid ADHD and mental health disorders: are these children more likely to develop reading disorders? *Attention Deficit and Hyperactivity Disorders*, 5(1), 21-28.
16. Linna, S. L., & Moilanen, I. (1994). The Finnish National Epidemiological Study of Child Psychiatric Disorders. Results from prevalence screening in northern Finland. *Arctic Medical Research*, 53 Suppl 1, 7-11.
17. Mahfouz, A. A., Al-Gelban, K. S., Al Amri, H., Khan, M. Y., Abdelmoneim, I., Daffalla, A. A., . . . Mohammed, A. A. (2009). Adolescents' mental health in Abha city, southwestern Saudi Arabia. *International Journal of Psychiatry in Medicine*, 39(2), 169-177.
18. Manti, E., Scholte, E. M., & Van Berckelaer-Onnes, I. A. (2009). A cross-cultural comparison of childhood developmental disorders between schoolchildren in the Netherlands and Greece. *European Journal of Special Needs Education*, 24(4), 437-454.

19. McDermott, P. A. (1996). A nationwide study of developmental and gender prevalence for psychopathology in childhood and adolescence. *Journal of Abnormal Child Psychology*, 24(1), 53-66.
20. Modrzejewska, R., & Bomba, J. (2010). Mental disorders and psychoactive substance use in metropolitan late adolescent population: Assessment of prevalence with self-report scales. *Archives of Psychiatry and Psychotherapy*, 12(3), 11-19.
21. Mojtabai, R. (2006). Serious emotional and behavioral problems and mental health contacts in American and British children and adolescents. *Journal of the American Academy of Child and Adolescent Psychiatry*, 45(10), 1215-1223.
22. Olfson, M., Druss, B., & Marcus, S. (2015). Trends in mental health care among children and adolescents. *The New England Journal of Medicine*, 372(21), 2029-2038.
23. Patalay, P., & Fitzsimons, E. (2018). Development and predictors of mental ill-health and wellbeing from childhood to adolescence. *Social Psychiatry & Psychiatric Epidemiology*, 53(12), 1311-1323.
24. Paterson, J., Carter, S., Gao, W., & Perese, L. (2007). Pacific Islands Families Study: Behavioral problems among two-year-old Pacific children living in New Zealand. *Journal of Child Psychology and Psychiatry and Allied Disciplines*, 48(5), 514-522.
25. Patton, G. C., Coffey, C., Romaniuk, H., Mackinnon, A., Carlin, J. B., Degenhardt, L., . . . Moran, P. (2014). The prognosis of common mental disorders in adolescents: A 14-year prospective cohort study. *The Lancet*, 383(9926), 1404-1411.
26. Philipp, J., Zeiler, M., Waldherr, K., Nitsch, M., Dur, W., Karwautz, A., & Wagner, G. (2014). The Mental Health in Austrian Teenagers (MHAT)-Study: Preliminary results from a pilot study. *Neuropsychiatrie*, 28(4), 198-207.
27. Raos, R., & Janus, M. (2011). Examining spatial variations in the prevalence of mental health problems among 5-year-old children in Canada. *Social Science and Medicine*, 72(3), 383-388.
28. Rouquette, A., Côté, S. M., Pryor, L. E., Carbonneau, R., Vitaro, F., & Tremblay, R. E. (2014). Cohort profile: The Quebec Longitudinal Study of Kindergarten Children (QLSKC). *International Journal of Epidemiology*, 43(1), 23-33.
29. Sawyer, M. G., Baghurst, P., & Clark, J. (1992). Differences between reports from children, parents and teachers: Implications for epidemiological studies. *Australian and New Zealand Journal of Psychiatry*, 26(4), 652-660.
30. Sawyer, M. G., Guidolin, M., Schulz, K., McGinnes, B., Baghurst, P., & Zubrick, S. R. (2010). Mental health problems among young people on remand: has anything changed since 1989? *Australian and New Zealand Journal of Public Health*, 34(6), 594-597.
31. Sequeira, S. L., Silk, J. S., Woods, W. C., Kolko, D. J., & Lindhiem, O. (2020). Psychometric properties of the SCARED in a nationally representative U.S. sample of 5–12-year-olds. *Journal of the Clinical Child & Adolescent Psychology*, 49(6), 761-772.
32. Shiue, I. (2017). Child mental health behaviours that predicted the use of health services in Wales from 2011 to 2014. *Acta Paediatrica*, 106(6), 1006.
33. Simon, A. E., Pastor, P. N., Reuben, C. A., Huang, L. N., & Goldstrom, I. D. (2015). Use of mental health services by children ages six to 11 with emotional or behavioral difficulties. *Psychiatric Services*, 66(9), 930-937.
34. Simpson, G. A., Bloom, B., Cohen, R. A., Blumberg, S., & Bourdon, K. H. (2005). U.S. children with emotional and behavioral difficulties: data from the 2001, 2002, and 2003 National Health Interview Surveys. *Advance Data*, (360), 1-13.
35. Smalley, S. L., McGough, J. J., Moilanen, I. K., Loo, S. K., Taanila, A., Ebeling, H., . . . Järvelin, M.-R. (2007). Prevalence and psychiatric comorbidity of attention-deficit/hyperactivity disorder in an adolescent Finnish population. *Journal of the American Academy of Child & Adolescent Psychiatry*, 46(12), 1575-1583.
36. Swanson, S., & Colman, I. (2013). Association between exposure to suicide and suicidality outcomes in youth. *Canadian Medical Association Journal*, 185(10), 870-877.
37. Włodarczyk, O., Pawils, S., Metzner, F., Kriston, L., Wendt, C., Klasen, F., . . . Group, B. S. (2016). Mental Health Problems Among Preschoolers in Germany: Results of the BELLA Preschool Study. *Child Psychiatry & Human Development*, 47(4), 529-538.

**Diagnoses and impairment not based on DSM-IV(TR), DSM-5 or ICD-10 (n=19)**

1. Almqvist, F., Puura, K., Kumpulainen, K., Tuompo-Johansson, E., Henttonen, I., Huikko, E., . . . Tamminen, T. (1999). Psychiatric disorders in 8–9-yr-old children based on a diagnostic interview with the parents. *European Child & Adolescent Psychiatry*, 8(Suppl 4), 17-28.
2. Carr, A. (1993). The epidemiology of psychological disorders in Irish children. *The Irish Journal of Psychology*, 14(4), 546-560.
3. Cohen, P., Cohen, J., Kasen, S., Velez, C. N., Hartmark, C., Johnson, J., . . . Streuning, E. L. (1993). An epidemiological study of disorders in late childhood and adolescence: I Age- and gender-specific prevalence. *Child Psychology & Psychiatry & Allied Disciplines*, 34(6), 851-867.
4. Faravelli, C., Degl'Innocenti, B. D., Aiazzi, L., Incerpi, G., & Pallanti, S. (1990). Epidemiology of mood disorders: A community survey in Florence. *Journal of Affective Disorders*, 20, 135–141.
5. Fergusson, D. M., & Horwood, L. J. (2001). The Christchurch Health and Development Study: review of findings on child and adolescent mental health. *Australian & New Zealand Journal of Psychiatry*, 35(3), 287-296.
6. Fombonne, E. (1994). The Chartres study: I Prevalence of psychiatric disorders among French school-aged children. *The British Journal of Psychiatry*, 164, 69-79.
7. Ghubash, R., Hamdi, E., & Bebbington, P. (1992). The Dubai Community Psychiatric Survey: I Prevalence and socio-demographic correlates. *Social Psychiatry and Psychiatric Epidemiology*, 27(2), 53-61.
8. Giaconia, R. M., Reinherz, H. Z., Silverman, A. B., Pakiz, B., Frost, A. K., & Cohen, E. (1994). Ages of onset of psychiatric disorders in a community population of older adolescents. *Journal of the American Academy of Child & Adolescent Psychiatry*, 33(5), 706-717.
9. Halfon, N., & Newacheck, P. W. (1999). Prevalence and impact of parent-reported disabling mental health conditions among U.S. Children. *Journal of the American Academy of Child and Adolescent Psychiatry*, 38(5), 600-609.
10. Lahey, B. B., Flagg, E. W., Bird, H. R., & Schwab-Stone, M. E. (1996). The NIMH Methods for the Epidemiology of Child and Adolescent Mental Disorders (MECA) study: Background and methodology. *Journal of the American Academy of Child & Adolescent Psychiatry*, 35(7), 855-864.
11. McArdle, P., Prosser, J., & Kolvin, I. (2004). Prevalence of psychiatric disorder: With and without psychosocial impairment. *European Child & Adolescent Psychiatry*, 13(6), 347-353.
12. Offord, D., Boyle, M., Campbell, D., Goering, P., Lin, E., Wong, M., & Racine, Y. (1996). One-year prevalence of psychiatric disorder in Ontarians 15 to 64 years of age. *Canadian Journal of Psychiatry*, 41, 559–563.
13. Puura, K., Almqvist, F., Tamminen, T., Piha, J., Rasanen, E., Kumpulainen, K., . . . Koivisto, A. M. (1998). Psychiatric disturbances among prepubertal children in southern Finland. *Social Psychiatry & Psychiatric Epidemiology*, 33(7), 310-318.
14. Rohde, P., Lewinsohn, P. M., & Seeley, J. R. (1996). Psychiatric comorbidity with problematic alcohol use in high school students. *Journal of the American Academy of Child & Adolescent Psychiatry*, 35(1), 101-109.
15. Romano, E., Tremblay, R., Vitaro, F., Zoccolillo, M., & Pagani, L. (2001). Prevalence of psychiatric diagnoses and the role of perceived impairment: Findings from an adolescent community sample. *Journal of Child Psychology and Psychiatry*, 42(4), 451–461.
16. Rubio-Stipec, M., Canino, G., Shrout, P., Dulcan, M., Freeman, D., & Bravo, M. (1994). Psychometric properties of parents and children as informants in child psychiatry epidemiology with the Spanish Diagnostic Interview Schedule for Children (DISC.2). *Journal of Abnormal Child Psychology*, 22(6), 703–720.
17. Sanford, M. N., Offord, D. R., Boyle, M. H., Peace, A., & Racine, Y. A. (1992). Ontario Child Health Study: Social and school impairments in children aged 6 to 16 years. *Journal of the American Academy of Child & Adolescent Psychiatry*, 31(1), 60-67.
18. Walker, R. D., Lambert, M. D., Walker, P. S., Kivlahan, D. R., Donovan, D. M., & Howard, M. O. (1996). Alcohol abuse in urban Indian adolescents and women: a longitudinal study for assessment and risk evaluation. *American Indian and Alaska Native Mental Health Research: Journal of the National Center*, 7(1), 1-47.
19. Whitbeck, L. B., Yu, M., Johnson, K. D., Hoyt, D. R., & Walls, M. L. (2008). Diagnostic prevalence rates from early to mid-adolescence among indigenous adolescents: First results from a longitudinal study. *Journal of the American Academy of Child & Adolescent Psychiatry*, 47(8), 890-900.

**Not focused on children (n=17)**

1. Altwajri, Y. A., Al-Habeeb, A., Al-Subaie, A. S., Bilal, L., Al-Desouki, M., Shahab, M. K., ... Kessler, R. C. (2020). Twelve-month prevalence and severity of mental disorders in the Saudi National Mental Health Survey. *International Journal of Methods in Psychiatric Research*, 29(3), 1–15.
2. Araya, R., Rojas, G., Fritsch, R., Acuña, J., & Lewis, G. (2001). Common mental disorders in Santiago, Chile: Prevalence and socio-demographic correlates. *British Journal of Psychiatry*, 178, 228–233.
3. Asselmann, E., Wittchen, H.-U., Lieb, R., Perkonig, A., & Beesdo-Baum, K. (2018). Incident mental disorders in the aftermath of traumatic events: A prospective-longitudinal community study. *Journal of Affective Disorders*, 227, 82–89.
4. Baxter, J., King, T. K., Tapsell, R., Durie, M., & McGee, M. A. (2006). Prevalence of mental disorders among Māori in Te Rau Hinengaro: The New Zealand Mental Health Survey. *Australian and New Zealand Journal of Psychiatry*, 40(10), 914–923.
5. Faravelli, C., Abrardi, L., Bartolozzi, D., Cecchi, C., Cosci, F., D'Adamo, D., ... Rosi, S. (2004). The Sesto Fiorentino study: Point and one-year prevalences of psychiatric disorders in an Italian community sample using clinical interviewers. *Psychotherapy and Psychosomatics*, 73, 226–234.
6. Fones, C. S., Kua, E. H., Ng, T. P., & Ko, S. M. (1998). Studying the mental health of a nation: A preliminary report on a population survey in Singapore. *Singapore Medical Journal*, 39(6), 251–255.
7. Fujiwara, T., Kawakami, N., & World Mental Health Japan Survey, G. (2011). Association of childhood adversities with the first onset of mental disorders in Japan: results from the World Mental Health Japan, 2002–2004. *Journal of Psychiatric Research*, 45(4), 481–487.
8. Grant, B. F., Dawson, D. A., Stinson, F. S., Chou, S. P., Dufour, M. C., & Pickering, R. P. (2004). The 12-month prevalence and trends in DSM-IV alcohol abuse and dependence: United States, 1991–1992 and 2001–2002. *Drug and Alcohol Dependence*, 74(3), 223–234.
9. Gravel, R., & Béland, Y. (2005). The Canadian Community Health Survey: Mental Health and Well-Being. *The Canadian Journal of Psychiatry*, 50(10), 573–579.
10. Jenkins, R., Bebbington, P., Brugha, T. S., Farrell, M., Lewis, G., & Meltzer, H. (1998). British psychiatric morbidity survey. *The British Journal of Psychiatry*, 173, 4–7.
11. Kessler, R. C. (1994). The National Comorbidity Survey of the United States. *International Review of Psychiatry*, 6(4), 365–376.
12. Mason, P., & Wilkinson, G. (1996). The prevalence of psychiatric morbidity: OPCS survey of psychiatric morbidity in Great Britain. *The British Journal of Psychiatry*, 168(1), 1–3.
13. Ormel, J., Raven, D., van Oort, F., Hartman, C. A., Reijneveld, S. A., Veenstra, R., ... Oldehinkel, A. J. (2015). Mental health in Dutch adolescents: A TRAILS report on prevalence, severity, age of onset, continuity and comorbidity of DSM disorders. *Psychological Medicine*, 45(2), 345–360.
14. Ravens-Sieberer, U., Otto, C., Kriston, L., Rothenberger, A., Dopfner, M., Herpertz-Dahlmann, B., ... group, B. s. (2015). The longitudinal BELLA study: design, methods and first results on the course of mental health problems. *European Child & Adolescent Psychiatry*, 24(6), 651–663.
15. Seva, A., Magallon, R., Merino, J. A., & Sarasola, A. (1990). Psychosocial disorders, incapacity, & utilization of the social services by a psychopathologically affected sample of an urban population. *The European Journal of Psychiatry*, 4(1), 5–18.
16. Tempier, R., Meadows, G. N., Vasiliadis, H.-M., Mosier, K. E., Lesage, A., Stiller, A., ... Lepnurm, M. (2009). Mental disorders and mental health care in Canada and Australia: Comparative epidemiological findings. *Social Psychiatry and Psychiatric Epidemiology*, 44(1), 63–72.
17. Vicente, B., Kohn, R., Rioseco, P., Saldivia, S., Baker, C., & Torres, S. (2004). Population prevalence of psychiatric disorders in Chile: 6-month and 1-month rates. *The British Journal of Psychiatry*, 184(4), 299–305.

**Not an original study or survey (n=16)**

1. Atladottir, H. O., Gyllenberg, D., Langridge, A., Sandin, S., Hansen, S. N., Leonard, H., ... Parner, E. T. (2015). The increasing prevalence of reported diagnoses of childhood psychiatric disorders: A descriptive multinational comparison. *European Child & Adolescent Psychiatry*, 24(2), 173–183.
2. Bjorkenstam, E., Burstrom, B., Vinnerljung, B., & Kosidou, K. (2016). Childhood adversity and psychiatric disorder in young adulthood: An analysis of 107,704 Swedes. *Journal of Psychiatric Research*, 77, 67–75.

3. Castagnini, A. C., Foldager, L., Caffo, E., & Thomsen, P. H. (2016). Early-adult outcome of child and adolescent mental disorders as evidenced by a national-based case register survey. *European Psychiatry*, 38, 45-50.
4. Centre for Chronic Disease Prevention. (2017). Positive Mental Health Surveillance Indicator Framework: Quick Stats, Youth (12 to 17 years of age), Canada, 2017 Edition. *Health Promotion and Chronic Disease Prevention in Canada*, 37(4), 131-132.
5. Dalsgaard, S., Thorsteinsson, E., Trabjerg, B. B., Schullehner, J., Plana-Ripoll, O., Brikell, I., ... Pedersen, C. B. (2019). Incidence rates and cumulative incidences of the full spectrum of diagnosed mental disorders in childhood and adolescence. *JAMA Psychiatry*, 77(2), 155-164.
6. Dopp, R. R., Lipson, S. K., & Eisenberg, D. (2013). Mental health among late adolescents and young adults from a population-level and clinical perspective. *Adolescent Medicine*, 24(3), 573-596.
7. Fombonne, E. (1998). The epidemiology of child and adolescent psychiatric disorders: recent developments and issues. *Epidemiologia e Psichiatria Sociale*, 7(3), 161-166.
8. Gattoni, M. E., Andreoni, L., Fonte, L., & Russo, A. (2015). [Analysis of psychological distress between the paediatric population immigrant and resident in a Local Health Unit of Milan Province (Northern Italy)]. *Epidemiologia e Prevenzione*, 39(3), 188-197.
9. Gyllenberg, D., Marttila, M., Sund, R., Jokiranta-Olkonien, E., Sourander, A., Gissler, M., & Ristikari, T. (2018). Temporal changes in the incidence of treated psychiatric and neurodevelopmental disorders during adolescence: An analysis of two national Finnish birth cohorts. *The Lancet Psychiatry*, 5(3), 227-236.
10. Lee, S. Y. & Bahn, G. H. (2020). Patterns of the diagnosis prevalence of psychiatric disorders in the population aged 0-18 years based on the nationwide insurance sample data. *Journal of the Korean Academy of Child and Adolescent Psychiatry*, 31(4), 214-224.
11. Madsen, K. B., Hohwü, L., Zhu, J. L., Olsen, J., & Obel, C. (2020) Social selection in cohort studies and later representation of childhood psychiatric diagnoses: The Danish National Birth Cohort. *Scandinavian Journal of Public Health*, 48(2), 207-213.
12. Patton, G. (1996). An epidemiological case for a separate adolescent psychiatry? *Australian & New Zealand Journal of Psychiatry*, 30(5), 563-566.
13. Paula, C. S., Barros, M. G., Vedovato, M. S., D'Antino, M. E., & Mercadante, M. T. (2006). [Mental health problems in adolescents: how to identify them?]. *Revista Brasileira de Psiquiatria*, 28(3), 254-255.
14. Sellers, R., Maughan, B., Pickles, A., Thapar, A., & Collishaw, S. (2015). Trends in parent- and teacher-rated emotional, conduct and ADHD problems and their impact in prepubertal children in Great Britain: 1999-2008. *Journal of Child Psychology and Psychiatry*, 56(1), 49-57.
15. Spady, D. W., Schopflocher, D. P., Svenson, L. W., & Thompson, A. H. (2001). Prevalence of mental disorders in children living in Alberta, Canada, as determined from physician billing data. *Archives of Pediatrics & Adolescent Medicine*, 155(10), 1153-1159.
16. Vassos, E., Agerbo, E., Mors, O., & Bøcker Pedersen, C. (2016). Urban-rural differences in incidence rates of psychiatric disorders in Denmark. *British Journal of Psychiatry*, 208(5), 435-440.

#### Did not report overall prevalence and/or $\geq$ three diagnostic groups (n=6)

1. Bilenberg, N., Petersen, D. J., Hoerder, K., & Gillberg, C. (2005). The prevalence of child-psychiatric disorders among 8-9-year-old children in Danish mainstream schools. *Acta Psychiatrica Scandinavica*, 111(1), 59-67.
2. Fombonne, E., Du Mazaubrun, C., Cans, C., & Grandjean, H. (1997). Autism and associated medical disorders in French epidemiological survey. *Journal of the American Academy of Child and Adolescent Psychiatry*, 36(11), 1561-1569.
3. Ford, T., Vizard, T., Sadler, K., McManus, S., Goodman, A., Merad, S., ... Collinson, D. (2020). Data resource profile: Mental Health of Children and Young People (MHCYP) surveys. *International Journal of Epidemiology*, 49(2), 363-364.
4. Petersen, D. J., & Bilenberg, N. (2003). [Prevalence of child psychiatric disorders in Danish 8-9-year-old children]. *Ugeskrift for Læger*, 165(40), 3822-3825.
5. Ringeisen, H., Aldworth, J., Colpe, L. J., Pringle, B., & Simile, C. (2015). Estimating the prevalence of any impairing childhood mental disorder in the national health interview survey. *International Journal of Methods in Psychiatric Research*, 24(4), 266-274.
6. Sawyer, M., Arney, F., Baghurst, P., Clark, J., Graetz, B., Kosky, B., ... Zubrick, S. (2001). The mental health of young people in Australia: Key findings from the child and adolescent component of the national survey of mental health and well-being. *Australian and New Zealand Journal of Psychiatry*, 35, 806-814.

**Diagnostic interview not reliable or validated (n=5)**

1. Cunningham, C. E., Boyle, M. H., Hong, S., Pettingill, P., & Bohaychuk, D. (2009). The Brief Child and Family Phone Interview (BCFPI): 1. Rationale, development, and description of a computerized children's mental health intake and outcome assessment tool. *Journal of Child Psychology & Psychiatry & Allied Disciplines*, 50(4), 416-423.
2. Jaju, S., Al-Adawi, S., Al-Kharusi, H., Morsi, M., & Al-Riyami, A. (2009). Prevalence and age-of-onset distributions of DSM IV mental disorders and their severity among school going Omani adolescents and youths: WMH-CIDI findings. *Child and Adolescent Psychiatry and Mental Health*, 3(1), 29.
3. Wagner, G., Zeiler, M., Waldherr, K., Philipp, J., Truttmann, S., Dür, W., . . . Karwautz, A. F. K. (2017). Mental health problems in Austrian adolescents: A nationwide, two-stage epidemiological study applying DSM-5 criteria. *European Child & Adolescent Psychiatry*, 26(12), 1483-1499.
4. West, P., Sweeting, H., Der, G., Barton, J., & Lucas, C. (2003). Voice-DISC Identified DSM-IV Disorders Among 15-Year-Olds in the West of Scotland. *Journal of the American Academy of Child & Adolescent Psychiatry*, 42(8), 941-949.
5. Zinzow, H., Ruggiero, K., Resnick, H., Hanson, R., Smith, B., Saunders, B., & Kilpatrick, D. (2009). Prevalence and mental health correlates of witnessed parental and community violence in a national sample of adolescents. *The Journal of Child Psychology and Psychiatry*, 54(4), 441-450.

**Not high-income country (n=3)**

1. Goodman, R., Slobodskaya, H., & Knyazev, G. (2005). Russian child mental health: A cross-sectional study of prevalence and risk factors. *European Child and Adolescent Psychiatry*, 14, 28-33.
2. Salum, G. A., Gadelha, A., Pan, P. M., Moriyama, T. S., Graeff-Martins, A. S., Tamanaha, A. C., . . . Rohde, L. A. (2015). High risk cohort study for psychiatric disorders in childhood: rationale, design, methods and preliminary results. *International Journal of Methods in Psychiatric Research*, 24(1), 58-73.
3. Shenoy, J., Kapur, M., & Kaliaperumal, V. G. (1996). Prevalence and pattern of psychological disturbance among five to eight year old school-going children: Preliminary findings. *NIMHANS Journal*, 14(1), 37-43.

**Not peer-reviewed (n=2)**

1. Goodman, R., Gledhill, J., & Ford, T. (2003). Child psychiatric disorder and relative age within school year: Cross sectional survey of large population sample. *BMJ*, 327(7413), 472-475.
2. Seva, A., Magallón, R., Sarasola, A., & Merino, J. A. (1992). Two-phased psychiatric epidemiological research in Zaragoza city (Project SAMAR-89). *Anales de Psiquiatría*, 8(2), 45-55.

**Reported lifetime diagnoses only (n=1)**

1. Ezpeleta, L., de la Osa, N., & Doménech, J. M. (2014). Prevalence of DSM-IV disorders, comorbidity and impairment in 3-year-old Spanish preschoolers. *Social Psychiatry and Psychiatric Epidemiology*, 49(1), 145-155.

## Appendix G: Meta-regression on the Effects of Potential Moderators on Overall Heterogeneity for Any Childhood Mental Disorder

**Table S1:** Meta-regression on effects of potential moderators on overall heterogeneity for any childhood mental disorder

| Moderator                                                                  | Overall<br>p-value* | Variable†                          | Rate difference estimation |          |
|----------------------------------------------------------------------------|---------------------|------------------------------------|----------------------------|----------|
|                                                                            |                     |                                    | Mean difference‡ (95% CI)  | p-value§ |
| Significant moderators                                                     |                     |                                    |                            |          |
| Overall study design                                                       | 0.027               | One-stage                          | Reference                  |          |
|                                                                            |                     | Two-stage                          | -0.057 (-0.09, -0.008)     | 0.027    |
| Study location<br>(Continent)                                              | 0.009               | North America                      | Reference                  |          |
|                                                                            |                     | Asia                               | 0.016 (-0.061, 0.13)       | 0.728    |
|                                                                            |                     | Europe                             | -0.09 (-0.127, -0.025)     | 0.012    |
|                                                                            |                     | Oceania                            | -0.032 (-0.114, 0.132)     | 0.631    |
|                                                                            |                     | South America                      | 0.055 (-0.073, 0.269)      | 0.494    |
| Diagnostic standard                                                        | 0.048               | DSM-IV(TR)                         | Reference                  |          |
|                                                                            |                     | ICD-10                             | -0.041 (-0.079, 0.024)     | 0.182    |
|                                                                            |                     | DSM-5                              | 0.123 (-0.002, 0.311)      | 0.056    |
| Diagnostic measure                                                         | <0.001              | DAWBA                              | Reference                  |          |
|                                                                            |                     | CAPA                               | 0.046 (-0.007, 0.124)      | 0.099    |
|                                                                            |                     | CIDI                               | -0.012 (-0.043, 0.038)     | 0.586    |
|                                                                            |                     | DISC-IV                            | 0.07 (0.031, 0.118)        | <0.001   |
|                                                                            |                     | MINI-KID                           | 0.109 (0.036, 0.213)       | <0.001   |
|                                                                            |                     | K-SADS-E                           | 0.163 (0.073, 0.281)       | <0.001   |
| Informants                                                                 | <0.001              | Parent, child                      | Reference                  |          |
|                                                                            |                     | Parent only                        | 0.067 (0.022, 0.122)       | 0.002    |
|                                                                            |                     | Child only                         | 0.093 (0.039, 0.16)        | <0.001   |
|                                                                            |                     | Parent, child, teacher             | -0.007 (-0.042, 0.04)      | 0.723    |
|                                                                            |                     | Parent, teacher                    | -0.058 (-0.078, -0.03)     | <0.001   |
| Diagnostic<br>algorithm for<br>reporting/combining<br>data from informants | <0.001              | Clinical judgement                 | Reference                  |          |
|                                                                            |                     | One source (child or parent only)¶ | 0.104 (0.05, 0.172)        | <0.001   |
|                                                                            |                     | OR rule                            | 0.03 (-0.007, 0.08)        | 0.121    |
| Timeframes for<br>assessing symptoms<br>and impairment                     | 0.003               | 12 months                          | Reference                  |          |
|                                                                            |                     | ≤6 months                          | 0.049 (-0.017, 0.138)      | 0.164    |
|                                                                            |                     | 1–12 months                        | -0.052 (-0.081, -0.011)    | 0.018    |
| Non-significant moderators                                                 |                     |                                    |                            |          |
| Sampling area                                                              | 0.356               | National                           | Reference                  |          |
|                                                                            |                     | Regional                           | 0.027 (-0.025, 0.103)      | 0.356    |
| Data collection years                                                      | 0.252               | ≤year 2010                         | Reference                  |          |
|                                                                            |                     | >year 2010                         | 0.032 (-0.019, 0.105)      | 0.252    |

|                |       |                       |                        |       |
|----------------|-------|-----------------------|------------------------|-------|
| Sampling frame | 0.185 | Households            | Reference              |       |
|                |       | National registry     | -0.065 (-0.106, 0.007) | 0.071 |
|                |       | Schools               | -0.026 (-0.071, 0.04)  | 0.391 |
| Child age      | 0.342 | All ages (e.g., 4–18) | Reference              |       |
|                |       | Children              | -0.044 (-0.086, 0.019) | 0.15  |
|                |       | Adolescents           | -0.028 (-0.078, 0.048) | 0.418 |
| Child sex      | 0.56  | All                   | Reference              |       |
|                |       | Boy                   | 0.005 (-0.047, 0.081)  | 0.876 |
|                |       | Girl                  | -0.026 (-0.067, 0.037) | 0.369 |

\* An overall p-value of <0.05 for the moderator indicates a significant source of heterogeneity.

† The variable with the greatest number of studies was selected as a reference variable.

‡ A positive mean difference indicates a higher prevalence in comparison to the reference variable; a negative mean difference indicates a lower prevalence.

§ A p-value of <0.05 for a variable indicates a significant difference in prevalence estimates in comparison to the reference variable.

¶ Separating the variable according to “child only” and “parent only” still yielded significant effects ( $p < 0.001$  for each variable).

CAPA, Child and Adolescent Psychiatric Assessment; CIDI, Composite International Diagnostic Interview; Structured; DAWBA, Development and Well-Being Assessment; DISC-IV, Diagnostic Interview Schedule for Children; DSM, Diagnostic and Statistical Manual of Mental Disorders; ICD, International Statistical Classification of Diseases and Related Health Problems; K-SADS-E, Kiddie Schedule for Affective Disorders and Schizophrenia-Epidemiological; MINI-KID, Mini-International Neuropsychiatric Interview for Children and Adolescents

## Appendix H: Forest Plots for Prevalence of Individual Disorders and Disorder Groups

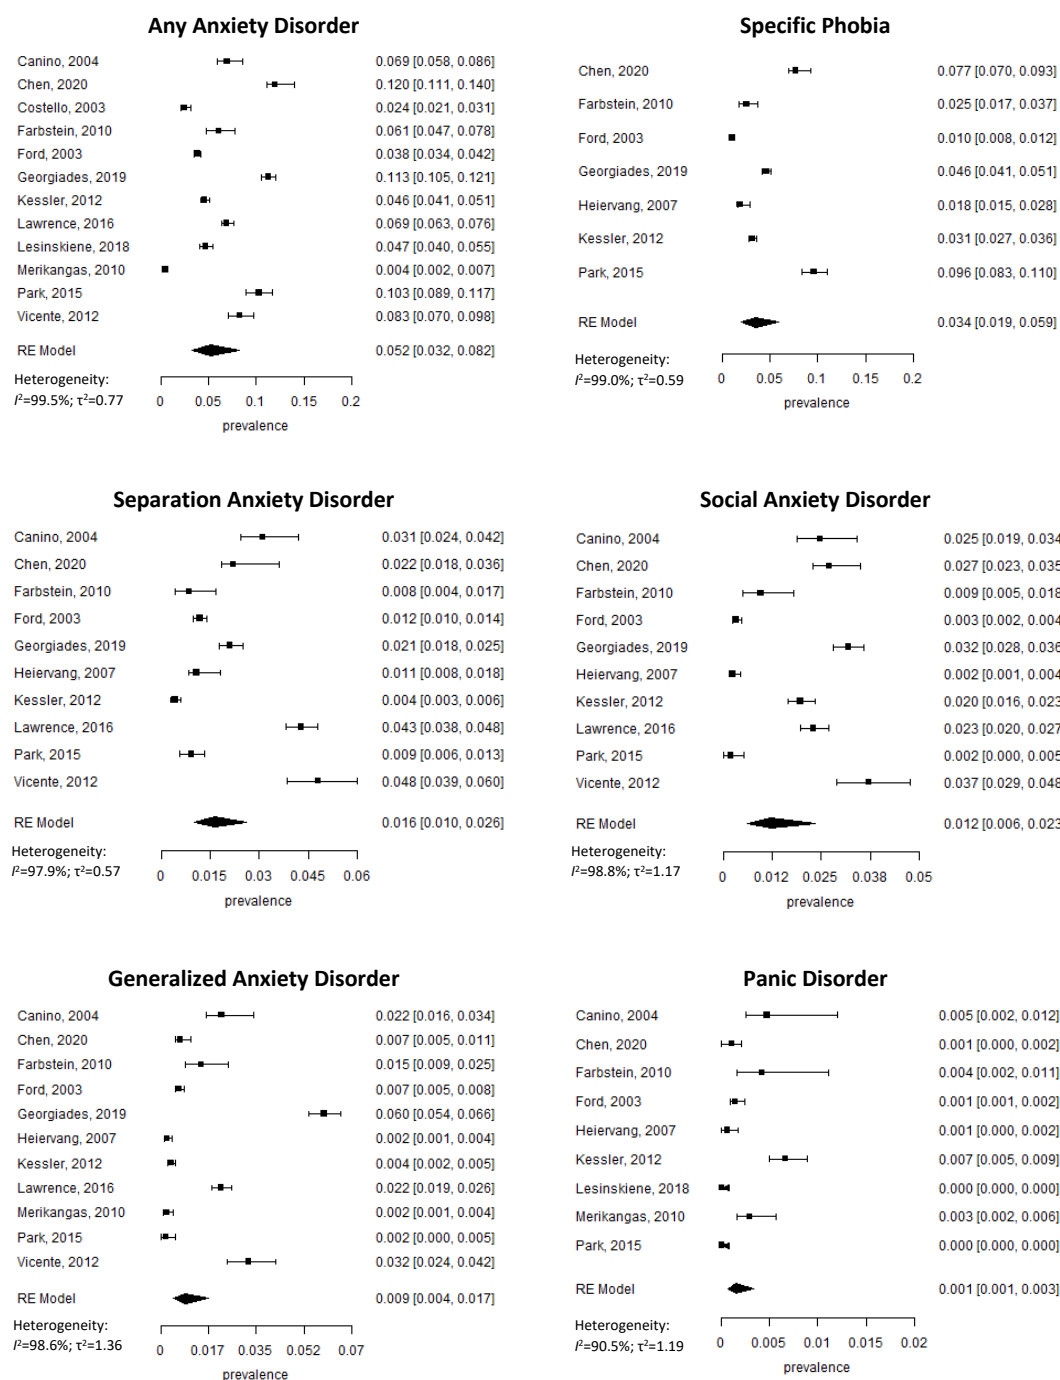

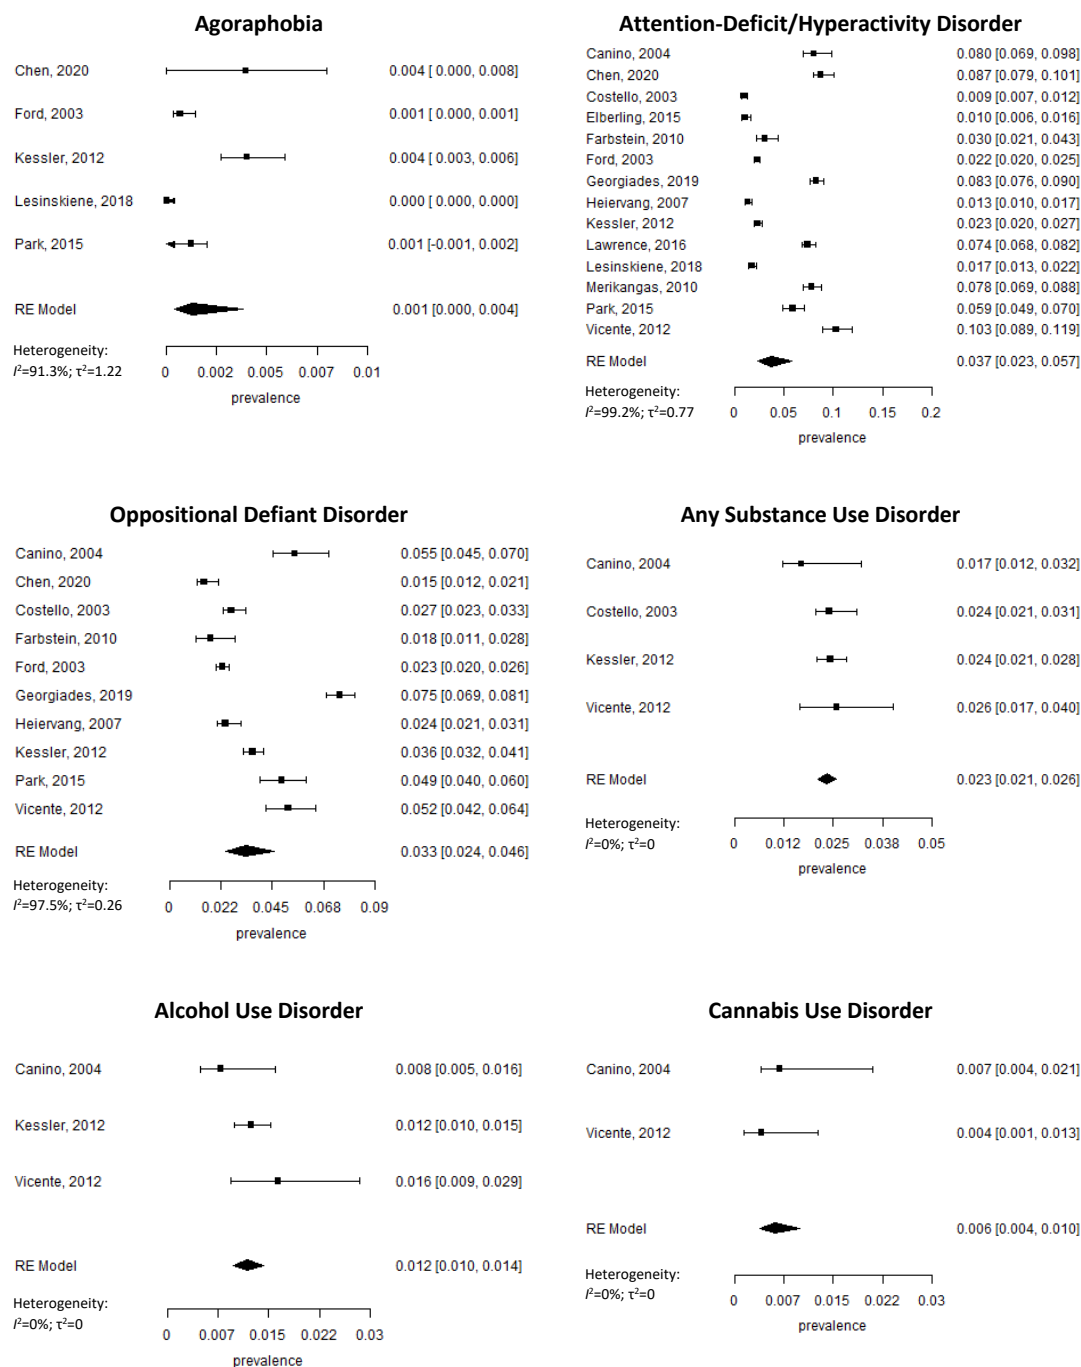

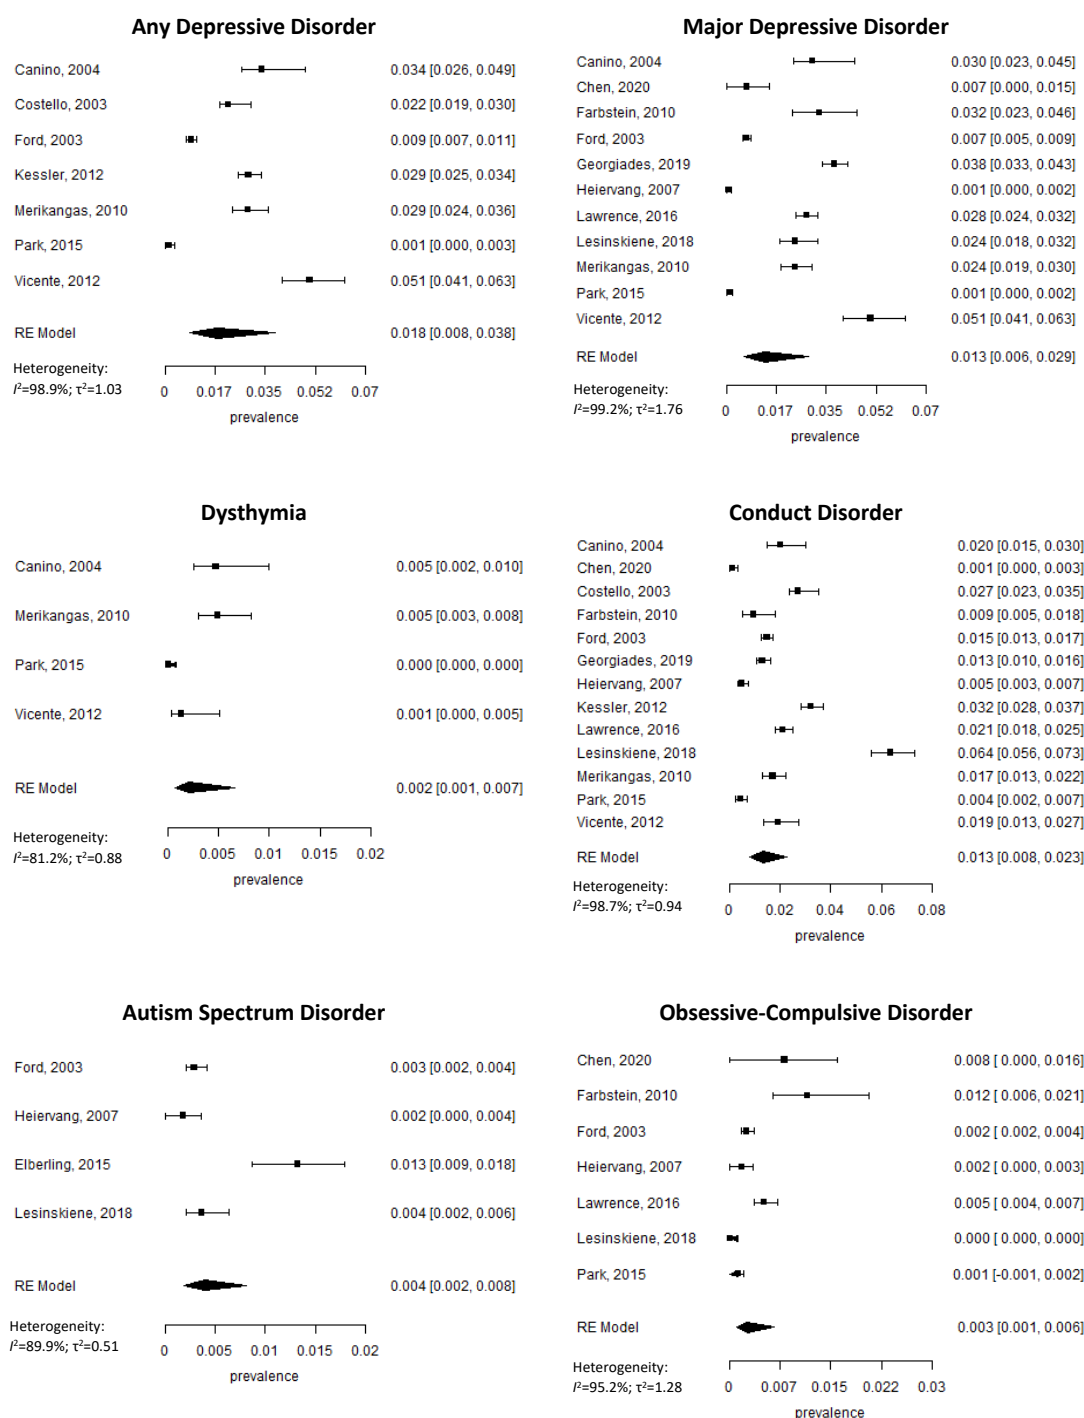

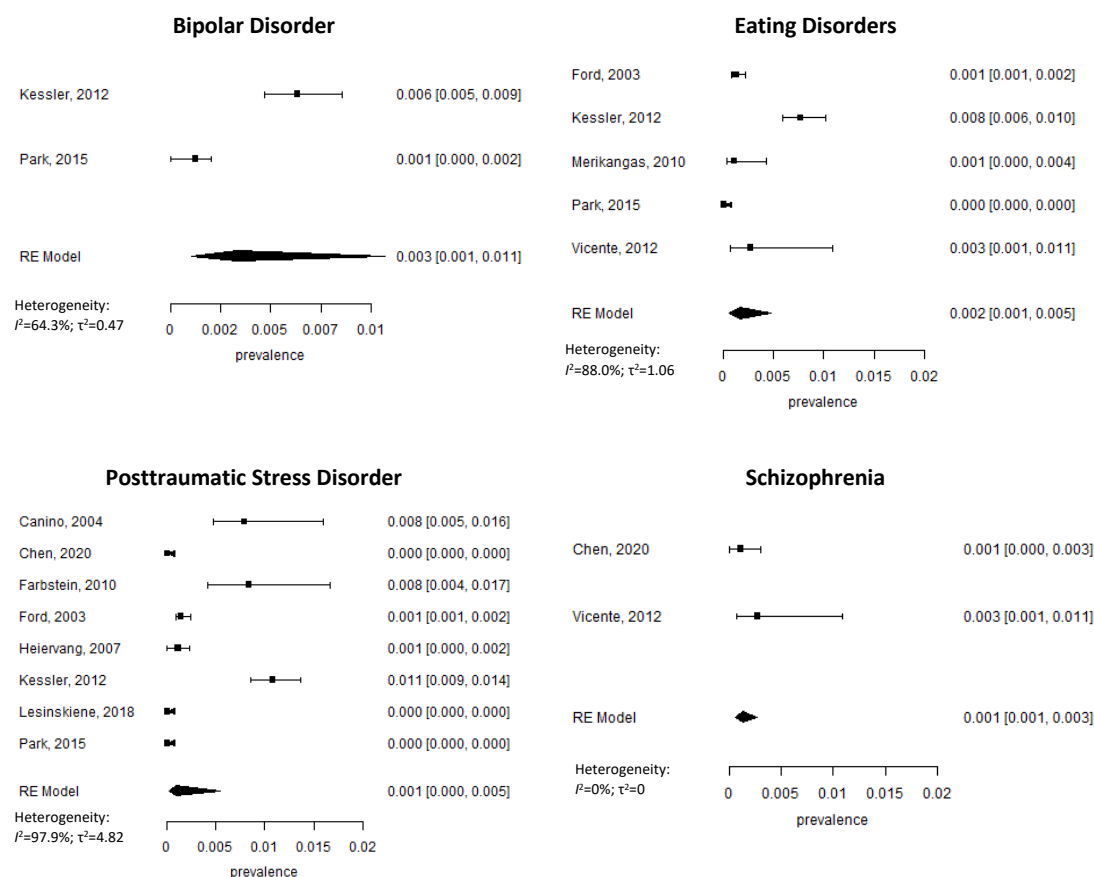

Note: Forest plots for individual disorders and categories of disorders included the prevalence estimates and the corresponding 95% confidence intervals.
